# Supplementary material for: Enhanced lithium-ion conductivity and interficial stability of Li-IL@Fe-BDC composite polymer electrolytes for solid-state lithium metal batteries
Source: Royal Society of Chemistry journal article supplement (doi:10.1039/d4gc00121d), 2024-01-01
Supplement: d4gc00121d1.pdf [file d4gc00121d1.pdf]

## Supporting information

### **Enhanced Lithium-Ion Conductivity and Interfacial Stability of Li-ILs@Fe-BDC Composite Polymer Electrolytes for Solid-State Lithium Metal Batteries**

Liequan Liu<sup>1</sup>, Zikang Gong<sup>1</sup>, Chen Liu<sup>1</sup>, Aiping Peng<sup>1</sup>, Ze Zhang<sup>1\*</sup>, Ji Yu<sup>1</sup>, Jianxin Cai<sup>1</sup>, Zhenyu Yang<sup>1,2\*</sup>

*<sup>1</sup>Key Laboratory of Jiangxi Province for Environment and Energy Catalysis, School of Chemistry and Chemical Engineering, Nanchang University, Nanchang, 330031, China*

*<sup>2</sup>School of Biological and Chemical Engineering, Zhejiang University of Science and Technology, Hangzhou, 310023, China*

Corresponding Author.

\*E-mail: zhangze@ncu.edu.cn

\*E-mail: zyyang@ncu.edu.cn

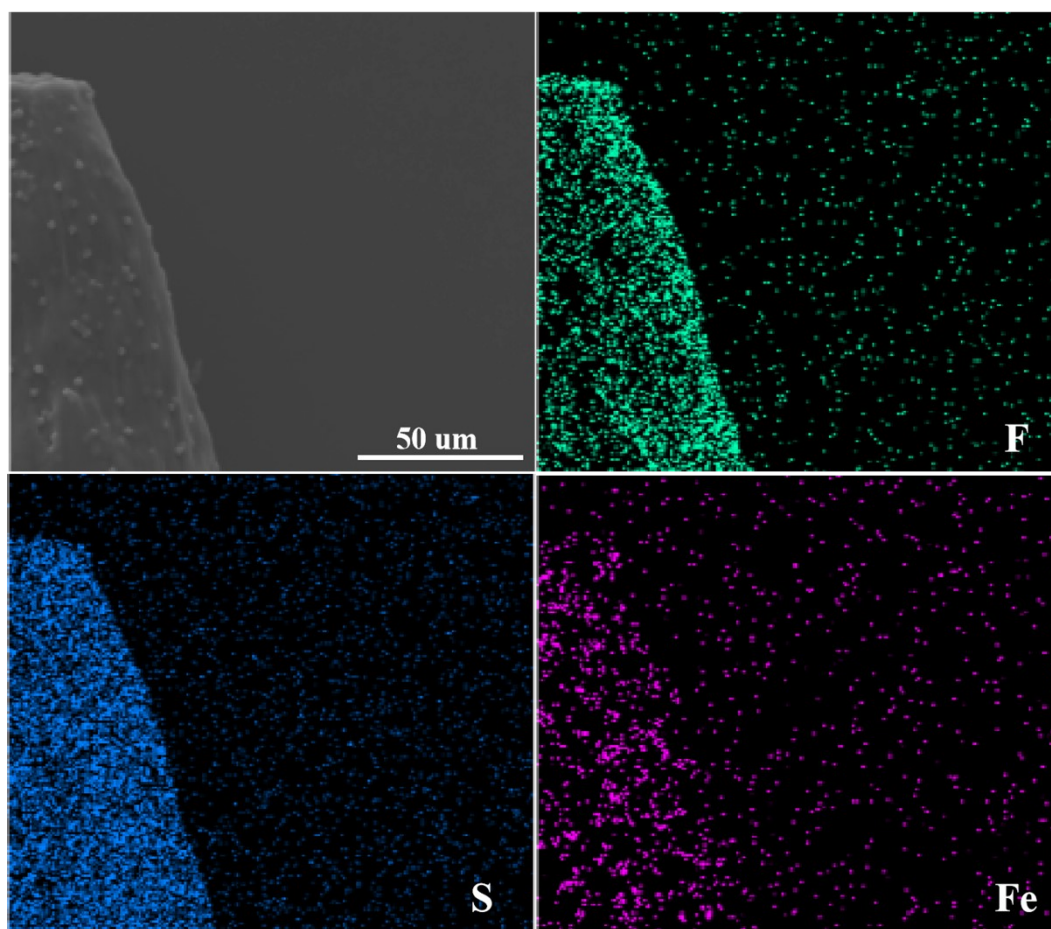

**Figure.S 1.** FESEM images and EDS mapping of CPE3 from surface.

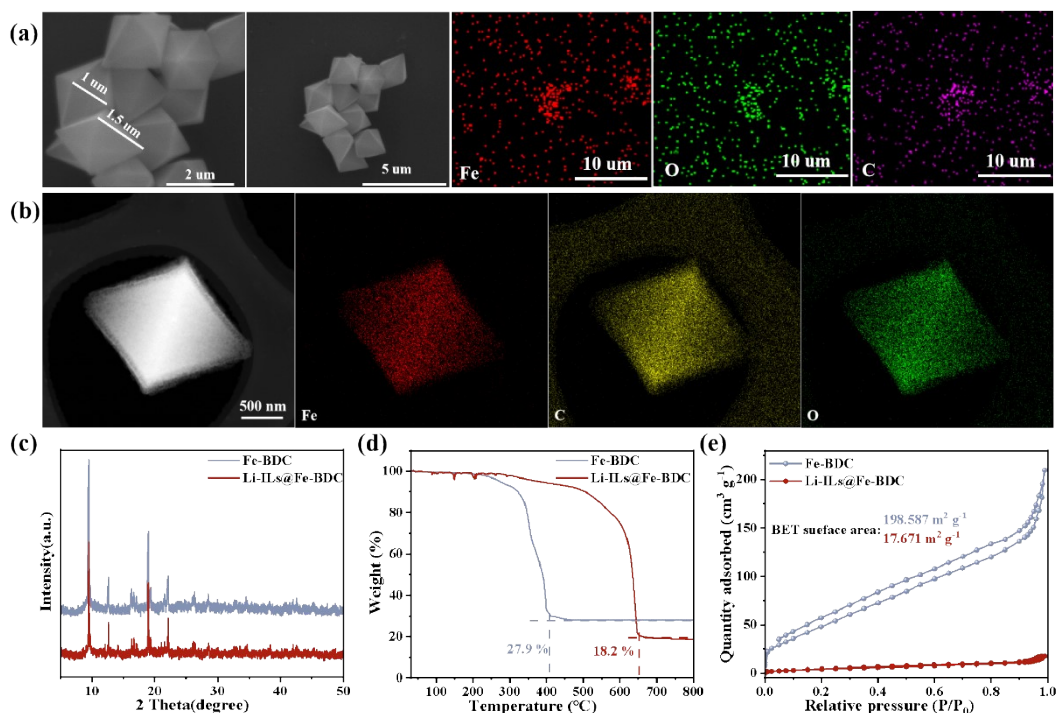

**Figure.S 2.** (a) FESEM image and EDS mapping of Fe-BDC; (b) TEM image and EDS mapping of Fe-BDC; (c) XRD spectra, (d) TG curves and (e) BET curves of Fe-BDC material and Li-ILs@Fe-BDC composite samples.

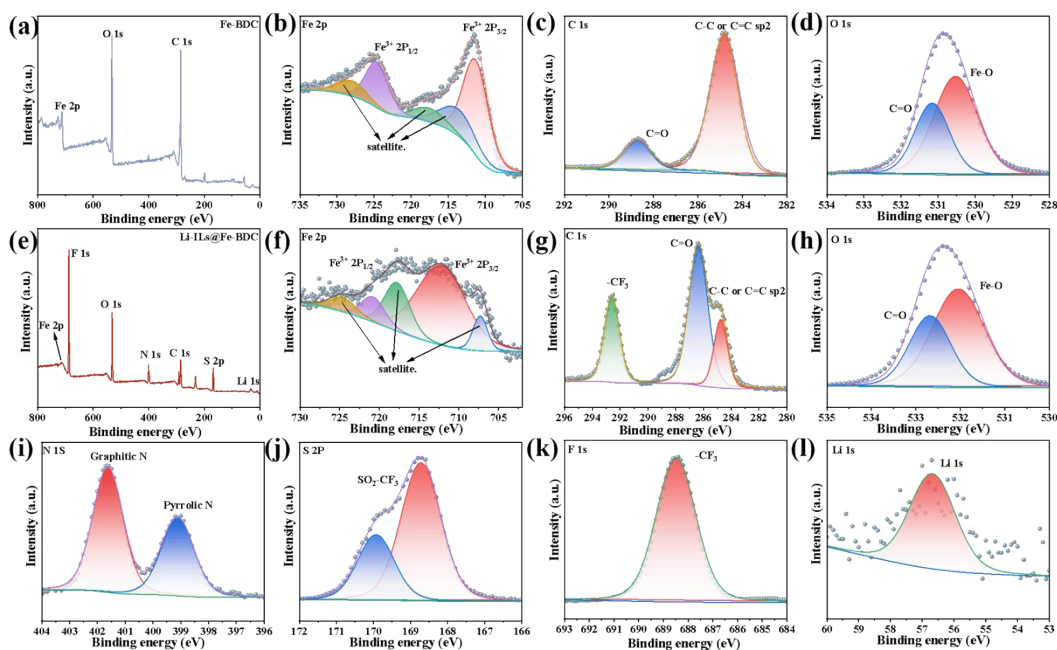

**Figure.S 3.** XPS spectra survey of (a) Fe-BDC and (e) Li-ILs@ Fe-BDC; (b) Fe 2p, (c) C 1s and (d) O 1s high-resolution spectra of Fe-BDC. (f) Fe 2p, (g) C 1s, (h) O 1s (i) N 1s, (j) S 2p, (k) F 1s and (l) Li 1s high-resolution spectra of Li-ILs@ Fe-BDC.

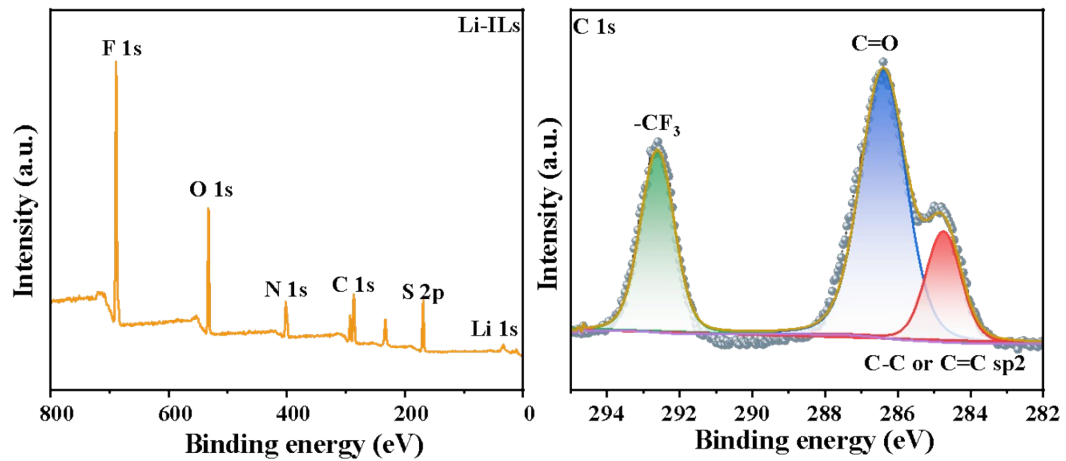

Figure.S 4. XPS spectra survey of Li-ILs and C 1s high-resolution spectra of Li-ILs.

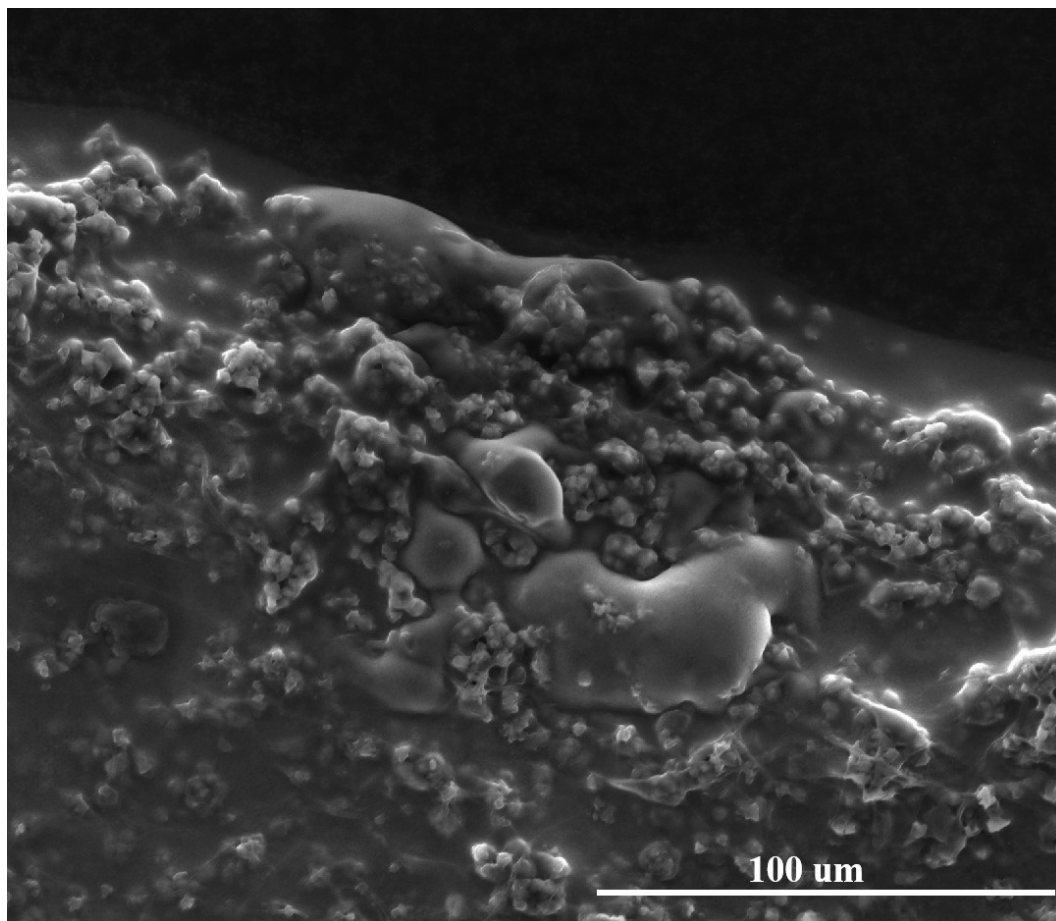

Figure.S 5. FESEM images of CPE4 from surface.

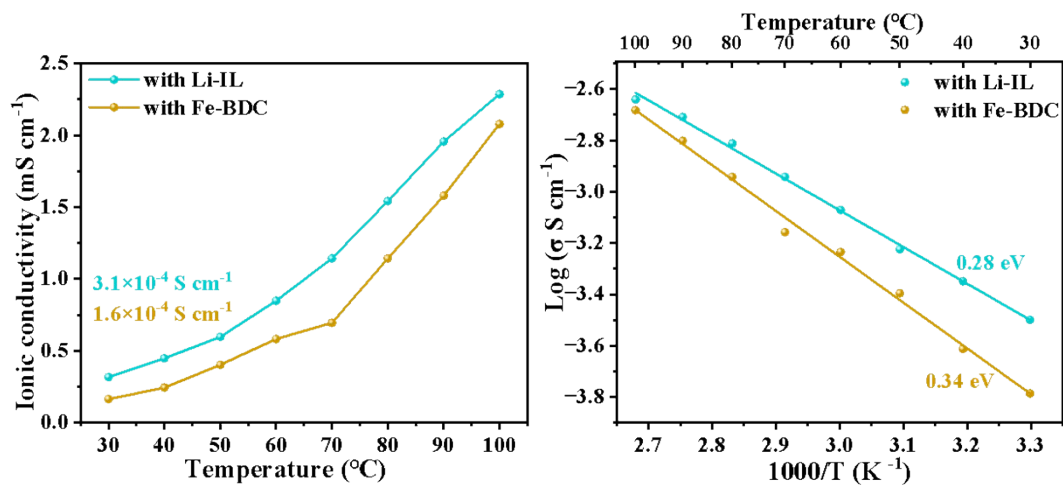

**Figure.S 6.** (a) Ionic conductivity ( $\delta$ ) of CPEs (with Li-IL and with Fe-BDC) under the different temperatures; (b) Relationship of  $\log(\delta)$  vs. Temperatures and ion mobilization activation energies of CPEs.

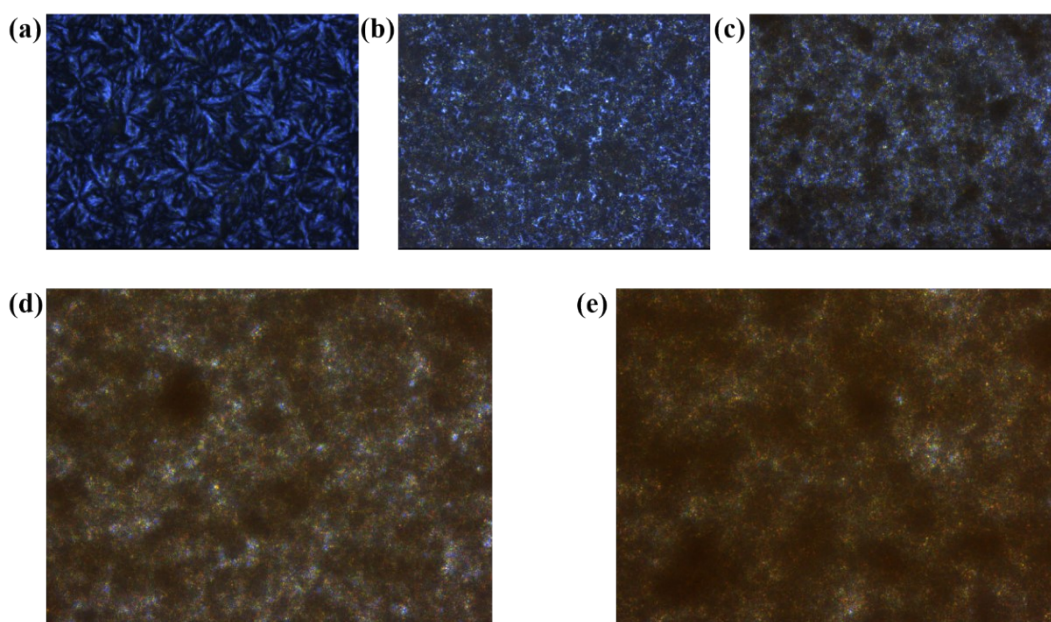

**Figure.S 7.** POM images of (a) CPE0, (b) CPE1, (c) CPE2, (d) CPE3, (e) CPE4.



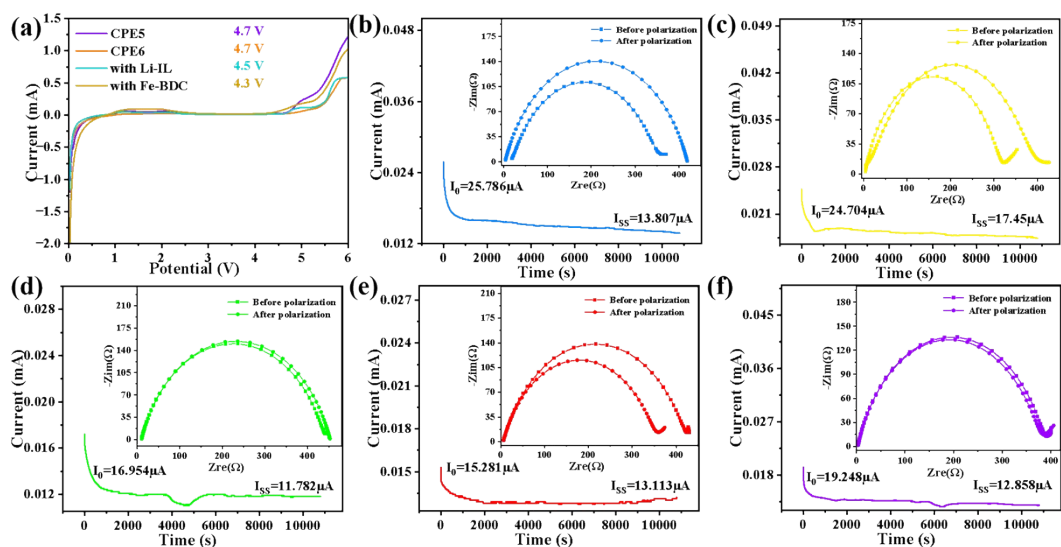

**Figure.S 8.** (a) Electrochemical stability window of CPE5, CPE6, CPEs with Li-IL and with Fe-BDC; Chronoamperometry profiles and AC impedance spectra before and afterpolarization (inset) for symmetric (b) Li/CPE0/Li cells, (c) Li/CPE1/Li cells, (d) Li/CPE2/Li cells, (e) Li/CPE3/Li cells, (f) Li/CPE4/Li cells.

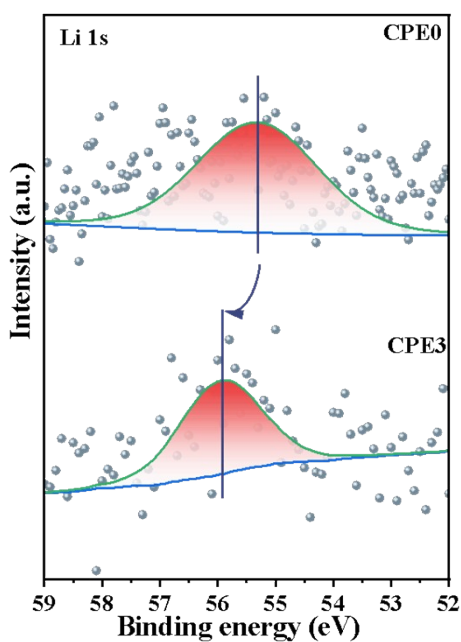

**Figure.S 9.** Li 1s high-resolution spectra of CPE0 and CPE3.

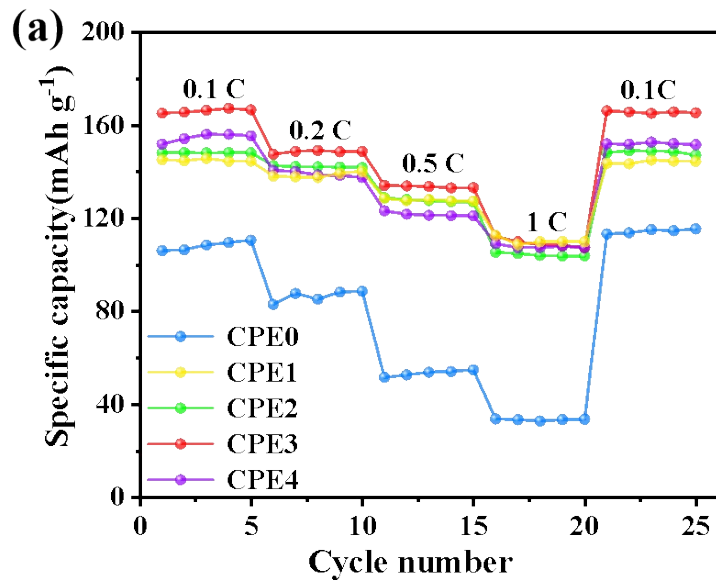

Figure.S 10. Rate performance of LFP/CPEs/Li cells.

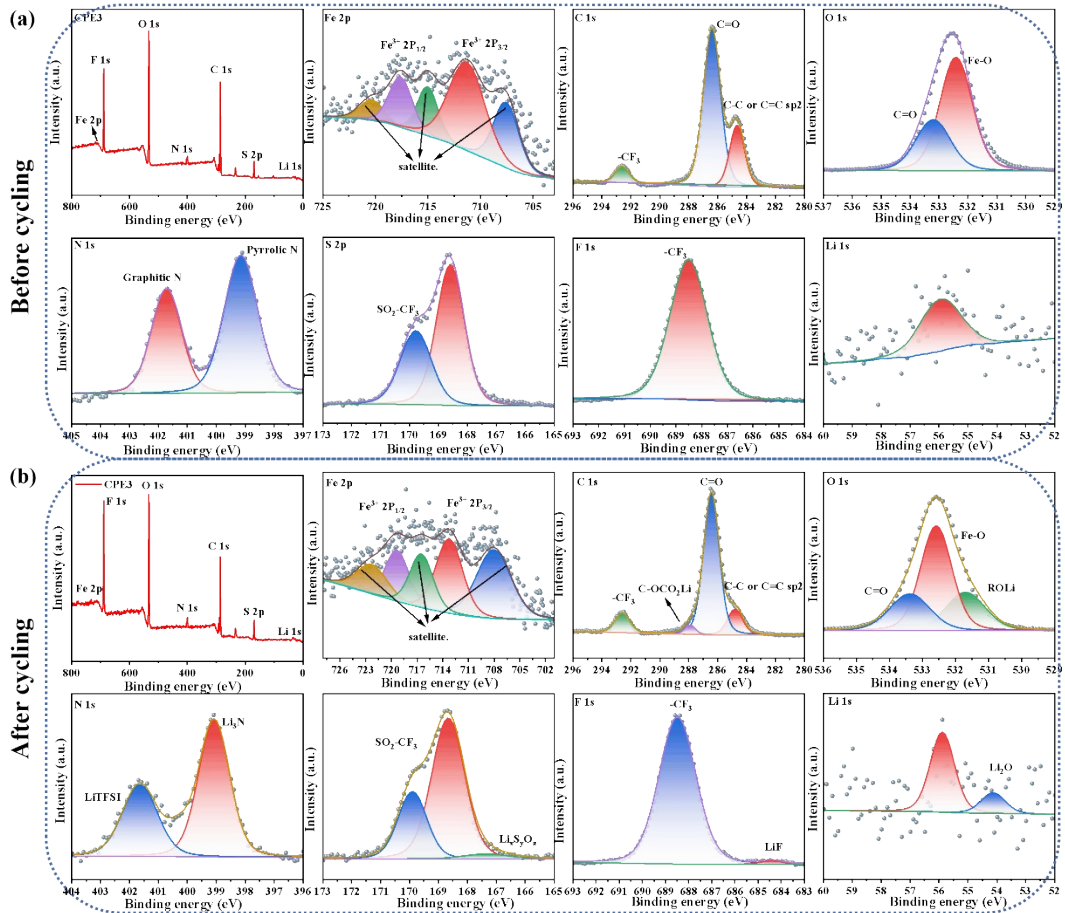

Figure.S 11. XPS spectra survey of CPE3 before and after cycling by LFP/CPE3/Li batteries.

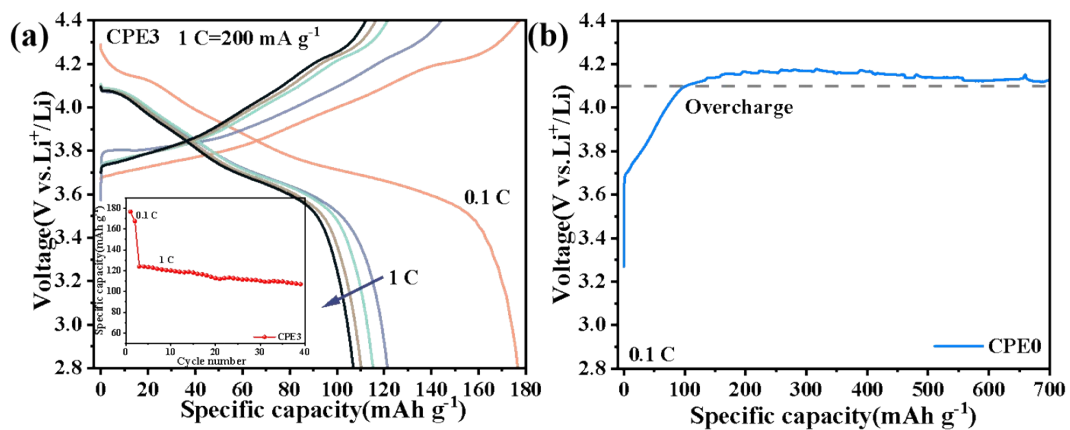

**Figure.S 12.** Charge and discharge voltage profiles of (a) NCM811/CPE3/Li cells (inset: the cycling performance of NCM811/CPE3/Li cells at 1 C) and (b) NCM811/CPE0/Li cells.
